# Supplementary material for: Multi-Omics Prognostic Signatures Based on Lipid Metabolism for Colorectal Cancer
Source: Front Cell Dev Biol. 2022 Feb 11;9:811957. doi: 10.3389/fcell.2021.811957 (PMC8874334; doi:10.3389/fcell.2021.811957)
Supplement: Supplementary file 6 [file DataSheet2.xlsx]

## Sheet: Peak_t
Name	m/z	HMDB	t.stat	p.value	FDR
PA(14:1(9Z)/18:4(6Z,9Z,12Z,15Z))	603.352	HMDB0114799	28.122	5.31e-77	1.75e-76
PS(22:1(13Z)/22:6(4Z,7Z,10Z,13Z,16Z,19Z))	872.535	HMDB0116778	28.122	5.31e-77	1.75e-76
LysoPC(14:1(9Z))	448.243	HMDB0010380	28.122	5.31e-77	1.75e-76
Cer(d18:1/23:0)	668.687	HMDB0000950	28.122	5.31e-77	1.75e-76
TG(18:1(11Z)/20:5(5Z,8Z,11Z,14Z,17Z)/18:1(11Z))	869.69	HMDB0049618	28.122	5.31e-77	1.75e-76
TG(22:0/o-18:0/20:2n6)	956.976	HMDB0046993	28.122	5.31e-77	1.75e-76
CL(18:0/22:5(4Z,7Z,10Z,13Z,16Z)/18:1(9Z)/22:5(7Z,10Z,13Z,16Z,19Z))	778.541	HMDB0057292	28.122	5.31e-77	1.75e-76
Oxychlordane	442.784	HMDB0059571	28.122	5.31e-77	1.75e-76
CL(i-14:0/i-12:0/i-12:0/i-17:0)	625.417	HMDB0075592	28.122	5.31e-77	1.75e-76
Ganglioside GM1 (18:1/9Z-18:1)	813.974	HMDB0004854	28.122	5.31e-77	1.75e-76
TG(18:1(9Z)/20:5(5Z,8Z,11Z,14Z,17Z)/22:5(7Z,10Z,13Z,16Z,19Z))	991.665	HMDB0050238	28.122	5.31e-77	1.75e-76
PS(15:0/16:0)	722.502	HMDB0112281	28.122	5.31e-77	1.75e-76
PS(22:5(4Z,7Z,10Z,13Z,16Z)/22:4(7Z,10Z,13Z,16Z))	918.564	HMDB0112834	28.122	5.31e-77	1.75e-76
TG(14:0/22:5(4Z,7Z,10Z,13Z,16Z)/14:0)	825.667	HMDB0042721	28.122	5.31e-77	1.75e-76
LysoPC(20:5(5Z,8Z,11Z,14Z,17Z))	564.287	HMDB0010397	28.122	5.31e-77	1.75e-76
CL(22:6(4Z,7Z,10Z,13Z,16Z,19Z)/22:5(7Z,10Z,13Z,16Z,19Z)	833.485	HMDB0059568	28.122	5.31e-77	1.75e-76
PA(14:0/22:5(4Z,7Z,10Z,13Z,16Z))	695.419	HMDB0114791	28.122	5.31e-77	1.75e-76
CDP-DG(i-14:0/a-17:0)	940.497	HMDB0116190	28.122	5.31e-77	1.75e-76
Ganglioside GT2 (d18:0/14:0)	659.989	HMDB0012023	28.122	5.31e-77	1.75e-76
CL(8:0/8:0/10:0/10:0)	481.279	HMDB0116832	28.122	5.31e-77	1.75e-76
LysoPE(0:0/22:1(13Z))	580.369	HMDB0011491	28.122	5.31e-77	1.75e-76
LysoPC(22:4(7Z,10Z,13Z,16Z))	589.413	HMDB0010401	28.122	5.31e-77	1.75e-76
PS(14:1(9Z)/18:3(9Z,12Z,15Z))	727.482	HMDB0012348	28.122	5.31e-77	1.75e-76
Ganglioside GM1 (18:1/22:0)	801.975	HMDB0004858	28.122	5.31e-77	1.75e-76
PC(DiMe(11,3)/MonoMe(11,5))	880.62	HMDB0061396	28.122	5.31e-77	1.75e-76
PA(20:3(5Z,8Z,11Z)/24:1(15Z))	665.356	HMDB0115143	28.122	5.31e-77	1.75e-76
PG(16:0/20:3(5Z,8Z,11Z))	772.551	HMDB0010578	28.122	5.31e-77	1.75e-76
DG(14:0/0:0/18:2n6)	578.472	HMDB0055967	28.122	5.31e-77	1.75e-76
TG(14:0/16:0/14:1(9Z))	749.653	HMDB0042128	28.122	5.31e-77	1.75e-76
LysoPE(0:0/24:1(15Z))	563.377	HMDB0011498	28.122	5.31e-77	1.75e-76
CE(15:0)	611.589	HMDB0060057	28.122	5.31e-77	1.75e-76
CL(8:0/8:0/8:0/18:2(9Z,11Z))	540.288	HMDB0116817	28.122	5.31e-77	1.75e-76
PIP(16:0/20:3(8Z,11Z,14Z))	941.546	HMDB0009930	28.122	5.31e-77	1.75e-76
PC(22:2(13Z,16Z)/22:6(4Z,7Z,10Z,13Z,16Z,19Z))	465.797	HMDB0008616	28.122	5.31e-77	1.75e-76
Tetracosanoic acid	386.395	HMDB0002003	28.122	5.31e-77	1.75e-76
DG(15:0/18:3(6Z,9Z,12Z)/0:0)	577.504	HMDB0007075	28.122	5.31e-77	1.75e-76
PIP2(18:1(11Z)/18:1(9Z))	523.237	HMDB0010076	28.122	5.31e-77	1.75e-76
TG(22:6(4Z,7Z,10Z,13Z,16Z,19Z)/20:5(5Z,8Z,11Z,14Z,17Z)/22:6(4Z,7Z,10Z,13Z,16Z,19Z))	518.337	HMDB0010560	28.122	5.31e-77	1.75e-76
Ganglioside GD3 (d18:0/24:0)	527.642	HMDB0011866	28.122	5.31e-77	1.75e-76
PC(MonoMe(11,5)/MonoMe(11,5))	894.633	HMDB0061450	28.122	5.31e-77	1.75e-76
PE(14:0/14:1(9Z))	634.45	HMDB0008822	28.122	5.31e-77	1.75e-76
LysoPC(20:3(5Z,8Z,11Z))	545.388	HMDB0010393	28.122	5.31e-77	1.75e-76
CDP-DG(18:2(9Z,11Z)/a-17:0)	956.519	HMDB0116049	28.122	5.31e-77	1.75e-76
PGP(a-13:0/i-12:0)	711.393	HMDB0116518	28.122	5.31e-77	1.75e-76
PGP(i-12:0/i-12:0)	713.33	HMDB0116536	28.122	5.31e-77	1.75e-76
PA(14:1(9Z)/14:0)	590.418	HMDB0114795	28.122	5.31e-77	1.75e-76
CL(22:5(4Z,7Z,10Z,13Z,16Z)/22:6(4Z,7Z,10Z,13Z,16Z,19Z)/22:5(4Z,7Z,10Z,13Z,16Z)/22:6(4Z,7Z,10Z,13Z,16Z,19Z))	864.53	HMDB0059379	28.122	5.31e-77	1.75e-76
PC(DiMe(9,3)/MonoMe(9,5))	824.518	HMDB0061425	28.122	5.31e-77	1.75e-76
CDP-DG(a-25:0/i-15:0)	554.335	HMDB0116142	28.122	5.31e-77	1.75e-76
PS(20:5(5Z,8Z,11Z,14Z,17Z)/22:5(4Z,7Z,10Z,13Z,16Z))	856.521	HMDB0112702	28.122	5.31e-77	1.75e-76
PS(14:0/24:1(15Z))	818.594	HMDB0112307	28.122	5.31e-77	1.75e-76
Tercatain	786.122	HMDB0039263	28.122	5.31e-77	1.75e-76
PC(18:3(6Z,9Z,12Z)/22:6(4Z,7Z,10Z,13Z,16Z,19Z))	828.518	HMDB0008189	28.122	5.31e-77	1.75e-76
CL(8:0/18:2(9Z,11Z)/18:2(9Z,11Z)/23:0)	705.486	HMDB0123894	28.122	5.31e-77	1.75e-76
Alpha-linolenyl carnitine	422.324	HMDB0006319	28.122	5.31e-77	1.75e-76
3-cis-Hydroxy-b,e-Caroten-3'-one	550.441	HMDB0002890	28.122	5.31e-77	1.75e-76
CL(16:0/18:2(9Z,12Z)/18:1(11Z)/18:1(11Z))	734.489	HMDB0056705	28.122	5.31e-77	1.75e-76
Schleichol 1	444.397	HMDB0036253	28.122	5.31e-77	1.75e-76
PC(14:0/18:1(9Z))	732.55	HMDB0007873	28.122	5.31e-77	1.75e-76
CL(18:2(9Z,12Z)/18:2(9Z,12Z)/18:2(9Z,12Z)/16:1(9Z))	712.477	HMDB0010245	28.122	5.31e-77	1.75e-76
Ganglioside GT3 (d18:1/16:0)	586.632	HMDB0012069	28.122	5.31e-77	1.75e-76
LysoPC(22:5(4Z,7Z,10Z,13Z,16Z))	592.336	HMDB0010402	28.122	5.31e-77	1.75e-76
Ganglioside GT3 (d18:0/22:0)	922.498	HMDB0012059	28.122	5.31e-77	1.75e-76
2-amino-4-({1-[(carboxymethyl)-C-hydroxycarbonimidoyl]-2-{[1-hydroxy-3-(4-hydroxyphenyl)-1-(5-methoxy-2,2-dimethyl-2H-chromen-6-yl)-3-oxopropan-2-yl]sulfanyl}ethyl}-C-hydroxycarbonimidoyl)butanoic acid	659.279	HMDB0125880	28.122	5.31e-77	1.75e-76
DG(20:1n9/0:0/18:2n6)	661.603	HMDB0056220	28.122	5.31e-77	1.75e-76
9,12-Hexadecadienoylcarnitine	396.338	HMDB0013334	28.122	5.31e-77	1.75e-76
O-decanoyl-L-carnitine	316.289	HMDB0062631	28.122	5.31e-77	1.75e-76
CL(8:0/8:0/10:0/18:2(9Z,11Z))	576.348	HMDB0116851	28.122	5.31e-77	1.75e-76
PIP(20:0/18:2(9Z,12Z))	486.293	HMDB0009997	28.122	5.31e-77	1.75e-76
Phytolaccinic acid	517.373	HMDB0034640	28.122	5.31e-77	1.75e-76
LysoPA(a-25:0/0:0)	501.365	HMDB0114762	28.122	5.31e-77	1.75e-76
CL(18:0/18:0/20:4(5Z,8Z,11Z,14Z)/18:0)	762.52	HMDB0057010	28.122	5.31e-77	1.75e-76
PE(DiMe(13,5)/DiMe(13,5))	477.35	HMDB0061491	28.122	5.31e-77	1.75e-76
LysoPE(0:0/24:6(6Z,9Z,12Z,15Z,18Z,21Z))	560.313	HMDB0011499	28.122	5.31e-77	1.75e-76
CL(i-13:0/i-22:0/i-12:0/i-13:0)	690.482	HMDB0073652	28.122	5.31e-77	1.75e-76
PS(22:5(7Z,10Z,13Z,16Z,19Z)/15:0)	796.538	HMDB0112841	28.122	5.31e-77	1.75e-76
LysoPE(0:0/18:2(9Z,12Z))	478.323	HMDB0011477	28.122	5.31e-77	1.75e-76
PE(14:0/22:6(4Z,7Z,10Z,13Z,16Z,19Z))	736.467	HMDB0008847	28.122	5.31e-77	1.75e-76
LysoPA(18:3(9Z,12Z,15Z)/0:0)	415.25	HMDB0114744	28.122	5.31e-77	1.75e-76
LysoPC(18:2(9Z,12Z))	502.37	HMDB0010386	28.122	5.31e-77	1.75e-76
Chlordecone	518.743	HMDB0059603	28.122	5.31e-77	1.75e-76
Dynorphin B (10-13)	446.249	HMDB0012936	28.122	5.31e-77	1.75e-76
PC(22:6(4Z,7Z,10Z,13Z,16Z,19Z)/22:1(13Z))	506.369	HMDB0008743	28.122	5.31e-77	1.75e-76
DG(10:0/0:0/a-25:0)	617.574	HMDB0093018	28.122	5.31e-77	1.75e-76
PS(14:0/20:4(5Z,8Z,11Z,14Z))	390.351	HMDB0012339	28.122	5.31e-77	1.75e-76
LysoPC(20:2(11Z,14Z))	548.342	HMDB0010392	28.122	5.31e-77	1.75e-76
DG(10:0/i-21:0/0:0)	555.529	HMDB0093007	28.122	5.31e-77	1.75e-76
PS(14:0/14:0)	680.42	HMDB0012330	28.122	5.31e-77	1.75e-76
TG(20:4(8Z,11Z,14Z,17Z)/22:4(7Z,10Z,13Z,16Z)/22:6(4Z,7Z,10Z,13Z,16Z,19Z))	521.375	HMDB0055644	28.122	5.31e-77	1.75e-76
LysoPC(22:2(13Z,16Z))	582.453	HMDB0010400	28.122	5.31e-77	1.75e-76
PC(18:0/22:6(4Z,7Z,10Z,13Z,16Z,19Z))	834.591	HMDB0008057	28.122	5.31e-77	1.75e-76
Decanoylcholine	258.278	HMDB0013228	28.122	5.31e-77	1.75e-76
DG(16:0/8:0/0:0)	456.438	HMDB0093596	28.122	5.31e-77	1.75e-76
DG(8:0/0:0/14:0)	428.375	HMDB0092914	28.122	5.31e-77	1.75e-76
Solacaproine	314.341	HMDB0034215	28.122	5.31e-77	1.75e-76
MG(21:0/0:0/0:0)	400.371	HMDB0072871	28.122	5.31e-77	1.75e-76
Capryloylcholine	230.247	HMDB0013225	28.122	5.31e-77	1.75e-76
MG(0:0/20:1(11Z)/0:0)	384.309	HMDB0011543	28.122	5.31e-77	1.75e-76
2(R)-hydroxydocosanoic acid	357.354	HMDB0061660	28.122	5.31e-77	1.75e-76
PA(8:0/8:0)	407.237	HMDB0114771	28.122	5.31e-77	1.75e-76
PE(14:1(9Z)/14:1(9Z))	638.388	HMDB0008855	28.122	5.31e-77	1.75e-76
Ganglioside GT3 (d18:0/18:1(9Z))	283.176	HMDB0012057	21.431	4.13e-57	1.35e-56
PS(20:4(5Z,8Z,11Z,14Z)/14:1(9Z))	754.434	HMDB0012430	15.395	2.09e-37	6.7e-37
PS(14:1(9Z)/16:1(9Z))	710.409	HMDB0012344	15.236	7.05e-37	2.25e-36
Ganglioside GD2 (d18:0/16:0)	843.93	HMDB0011839	-12.701	1.83e-28	5.77e-28
PE-NMe(18:4(6Z,9Z,12Z,15Z)/22:6(4Z,7Z,10Z,13Z,16Z,19Z))	798.46	HMDB0113276	10.831	2.01e-22	6.09e-22
PS(MonoMe(11,5)/MonoMe(9,5))	393.207	HMDB0061614	9.1159	3.64e-17	1.08e-16
(+)-Lyoniresinol 9-glucoside	583.256	HMDB0041148	8.2048	1.54e-14	4.43e-14
Substance P	674.369	HMDB0001897	-7.7181	3.41e-13	9.65e-13
PC(14:0/20:2(11Z,14Z))	780.54	HMDB0007880	-7.5055	1.27e-12	3.57e-12
LysoPE(22:6(4Z,7Z,10Z,13Z,16Z,19Z)/0:0)	526.286	HMDB0011526	7.3556	3.19e-12	8.91e-12
Simmondsin	376.173	HMDB0030394	6.8744	5.61e-11	1.54e-10
PGP(a-13:0/a-13:0)	701.394	HMDB0116512	6.8367	6.98e-11	1.91e-10
PA(16:0/14:1(9Z))	657.368	HMDB0114834	6.6643	1.89e-10	5.1e-10
Ganglioside GD1b (d18:1/24:1(15Z))	640.353	HMDB0011833	-6.226	2.19e-09	5.85e-09
Ganglioside GT3 (d18:0/12:0)	841.445	HMDB0012052	-6.2044	2.47e-09	6.55e-09
PE(14:1(9Z)/15:0)	724.368	HMDB0008856	-5.7232	3.18e-08	8.15e-08
DG(8:0/16:0/0:0)	456.435	HMDB0092923	-5.4394	1.34e-07	3.4e-07
MG(0:0/16:0/0:0)	330.335	HMDB0011533	-5.3997	1.64e-07	4.11e-07
PI(16:0/16:2(9Z,12Z))	806.545	HMDB0009780	5.3931	1.69e-07	4.24e-07
LysoPC(20:3(8Z,11Z,14Z))	546.343	HMDB0010394	-5.2942	2.75e-07	6.83e-07
PA(14:1(9Z)/22:6(4Z,7Z,10Z,13Z,16Z,19Z))	691.386	HMDB0114809	-5.0383	9.39e-07	2.28e-06
PA(18:4(6Z,9Z,12Z,15Z)/18:4(6Z,9Z,12Z,15Z))	695.38	HMDB0115038	-4.9897	1.18e-06	2.85e-06
PC(18:2(9Z,12Z)/22:6(4Z,7Z,10Z,13Z,16Z,19Z))	830.553	HMDB0008156	-4.9054	1.75e-06	4.21e-06
PS(14:1(9Z)/14:1(9Z))	675.414	HMDB0012342	-4.8155	2.64e-06	6.34e-06
LysoPE(18:2(9Z,12Z)/0:0)	478.287	HMDB0011507	4.6983	4.48e-06	1.06e-05
LysoPC(P-18:1(9Z))	512.331	HMDB0010408	4.5912	7.2e-06	1.68e-05
PS(16:0/20:5(5Z,8Z,11Z,14Z,17Z))	782.545	HMDB0112348	4.5488	8.66e-06	2.01e-05
LysoPE(0:0/22:5(4Z,7Z,10Z,13Z,16Z))	569.316	HMDB0011494	4.4315	1.44e-05	3.32e-05
LysoPC(22:6(4Z,7Z,10Z,13Z,16Z,19Z))	568.335	HMDB0010404	4.4026	1.63e-05	3.73e-05
DG(14:1n5/0:0/18:4n3)	558.427	HMDB0056151	-4.3152	2.35e-05	5.37e-05
PS(20:3(8Z,11Z,14Z)/18:3(9Z,12Z,15Z))	846.444	HMDB0012425	-4.3019	2.49e-05	5.65e-05
PC(18:4(6Z,9Z,12Z,15Z)/18:4(6Z,9Z,12Z,15Z))	812.417	HMDB0008240	-4.268	2.87e-05	6.48e-05
Ganglioside GD3 (d18:0/12:0)	716.408	HMDB0011856	-4.2114	3.62e-05	8.15e-05
Ganglioside GM2 (d18:1/22:1(13Z))	738.421	HMDB0011911	-4.1899	3.96e-05	8.85e-05
PS(DiMe(9,3)/MonoMe(11,3))	826.451	HMDB0061584	-4.1709	4.28e-05	9.49e-05
PGP(16:0/18:3(6Z,9Z,12Z))	842.485	HMDB0013478	4.0907	5.92e-05	0.00013067
Ganglioside GM3 (d18:1/18:0)	613.354	HMDB0004845	-4.0161	7.97e-05	0.00017463
Ganglioside GT3 (d18:1/20:0)	907.481	HMDB0012073	-4.0075	8.25e-05	0.00018023
PG(a-13:0/i-14:0)	652.414	HMDB0116644	3.9185	0.000117	0.00025417
Linoleyl carnitine	424.369	HMDB0006469	-3.887	0.00013219	0.00028567
MG(0:0/18:1(9Z)/0:0)	363.315	HMDB0011537	-3.8658	0.0001435	0.00030928
DHAP(18:0)	437.232	HMDB0011133	3.7521	0.0002212	0.00046933
Pipereicosalidine	374.301	HMDB0039738	-3.7347	0.00023611	0.00049968
LysoPC(18:0)	524.361	HMDB0010384	3.6924	0.00027647	0.00058058
CL(10:0/10:0/i-12:0/19:0)	605.368	HMDB0124676	3.4995	0.00055797	0.0011598
PS(18:4(6Z,9Z,12Z,15Z)/18:4(6Z,9Z,12Z,15Z))	782.426	HMDB0112496	-3.4085	0.00076914	0.0015827
MG(0:0/18:1(11Z)/0:0)	274.273	HMDB0011536	3.3908	0.00081806	0.0016792
PS(16:1(9Z)/14:1(9Z))	703.451	HMDB0012364	-3.3545	0.00092755	0.0018944
PC(18:1(11Z)/18:3(9Z,12Z,15Z))	782.548	HMDB0008074	-3.307	0.0010912	0.0022232
PC(16:0/22:4(7Z,10Z,13Z,16Z))	810.579	HMDB0007988	-3.2399	0.0013696	0.0027697
PE-NMe(14:1(9Z)/18:4(6Z,9Z,12Z,15Z))	696.44	HMDB0113003	3.1906	0.0016139	0.0032477
Ganglioside GD1b (d18:1/12:0)	885.469	HMDB0011822	-3.1698	0.0017288	0.0034619
PC(20:3(5Z,8Z,11Z)/22:6(4Z,7Z,10Z,13Z,16Z,19Z))	856.557	HMDB0008387	-3.1355	0.001935	0.0038559
Ganglioside GT3 (d18:1/23:0)	612.005	HMDB0012076	-3.0777	0.0023347	0.0045965
Ganglioside GD3 (d18:0/14:0)	730.421	HMDB0011857	3.0649	0.002433	0.0047785
PA(8:0/12:0)	481.257	HMDB0115483	3.057	0.0024954	0.0048892
Cer(d18:0/14:0)	512.501	HMDB0011759	3.0187	0.0028196	0.0054982
LysoPA(O-18:0/0:0)	424.339	HMDB0011144	2.9989	0.0030019	0.0058259
PS(18:0/20:4(8Z,11Z,14Z,17Z))	812.496	HMDB0010165	2.8779	0.0043734	0.0084677
Glucoliquiritin	581.234	HMDB0039508	2.8508	0.0047508	0.0091551
PIP(18:0/16:1(9Z))	934.528	HMDB0009947	-2.8451	0.0048331	0.0092917
LysoPI(20:4(5Z,8Z,11Z,14Z)/0:0)	643.284	HMDB0061690	-2.7905	0.0056967	0.010926
PE-NMe2(18:4(6Z,9Z,12Z,15Z)/15:0)	802.38	HMDB0114154	-2.7311	0.0067939	0.01291
MG(18:1(9Z)/0:0/0:0)	374.359	HMDB0011567	-2.6217	0.0093243	0.017515
TG(22:0/o-18:0/24:1(15Z))	549.527	HMDB0046990	-2.6159	0.0094778	0.017763
PIP(16:2(9Z,12Z)/16:0)	851.401	HMDB0009943	-2.5929	0.010118	0.018919
LysoPI(18:0/0:0)	565.308	HMDB0240261	2.5358	0.011871	0.022047
CDP-DG(20:1(11Z)/18:2(9Z,12Z))	525.304	HMDB0115979	-2.5335	0.011949	0.02214
PS(15:0/20:5(5Z,8Z,11Z,14Z,17Z))	768.471	HMDB0112333	2.456	0.014777	0.027136
Ganglioside GM2 (d18:1/14:0)	664.389	HMDB0011909	2.4249	0.016072	0.029186
Prupaside	553.246	HMDB0038951	-2.4081	0.016809	0.030457
LysoPC(14:0)	468.304	HMDB0010379	2.3626	0.018964	0.034287
MG(i-18:0/0:0/0:0)	358.365	HMDB0072842	-2.3007	0.022289	0.039945
LysoPA(18:3(6Z,9Z,12Z)/0:0)	432.238	HMDB0114743	-2.2873	0.023072	0.041078
